# Supplementary material for: Modulating the folding and binding of peptides using a stimuli-responsive molecular tweezer
Source: Royal Society of Chemistry journal article supplement (doi:10.1039/d3sc03758d), 2023-01-01
Supplement: d3sc03758d2.pdf [file d3sc03758d2.pdf]

## Supporting Information

### Modulating the Folding and Binding of Peptides

### Using a Stimuli-Responsive Molecular Tweezer

SooHo Ko<sup>[a], ‡</sup>, Joo-young Kim<sup>[b], ‡</sup>, Jung Yeon Park<sup>[c]</sup>, You-jin Jung<sup>[a]</sup>, Min-Jae Choi<sup>[d]</sup>, Kyeong Sik Jin<sup>[e]</sup>, Yongju Kim<sup>[c]</sup>, Yong-beom Lim<sup>[a],\*</sup>, and Woo-jin Jeong<sup>[b],[f],\*</sup>

[a] Department of Materials Science and Engineering, Yonsei University, Seoul 03722, Republic of Korea

[b] Department of Biological Sciences and Bioengineering, Inha University, Incheon, 22212, Republic of Korea

[c] KU-KIST Graduate School of Converging Science and Technology, Department of Integrative Energy Engineering, Korea University, Seoul 02841, Republic of Korea

[d] Department of Chemical & Biochemical Engineering, Dongguk University, Seoul, 06420, Republic of Korea

[e] Pohang Accelerator Laboratory, Pohang University of Science and Technology, Pohang 790-784, Republic of Korea

[f] Department of Biological Engineering, Inha University, Incheon, 22212, Republic of Korea

*KEYWORDS:  $\beta$ -hairpin-based molecular tweezer, Stimulus-responsive peptide folding,  $\alpha$ -helix stabilization, Controlled capture-and-release, Multivalent binding*

\*To whom correspondence should be addressed.

E-mail: [wjjeong@inha.ac.kr](mailto:wjjeong@inha.ac.kr)

**TMT-w** H-GEWTWDDA-TKTWTWTE-NH<sub>2</sub>

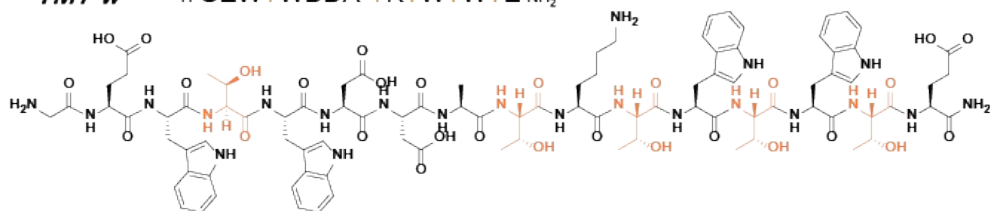

**TMT1** H-GEWTWDDA-CKTWTWCE-NH<sub>2</sub>

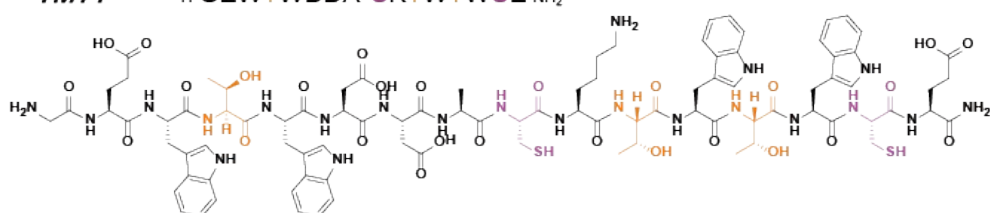

**TMT2** H-GEWTWDDA-CKTWCWTE-NH<sub>2</sub>

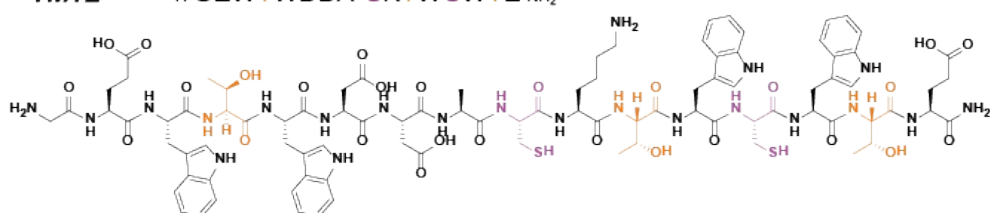

**TMT3** H-GEWCWDDA-CKTWTWTE-NH<sub>2</sub>

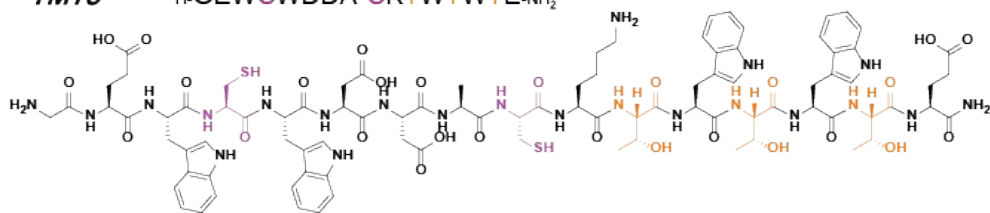

**p53f** Fluorecein-GETFSDLW-KLLPEC-NH<sub>2</sub>

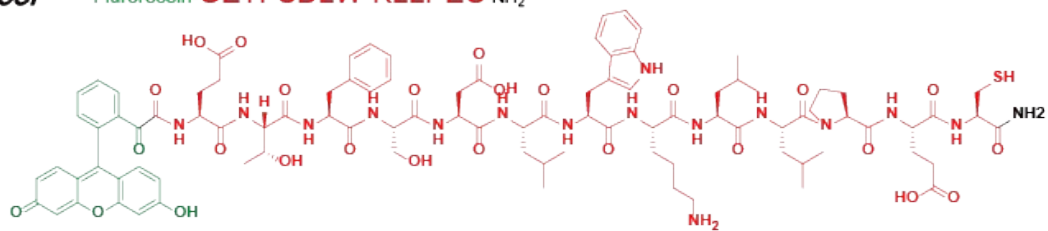

**Stapld p53a** Ac-SQETFCDLW-KLLCEN-NH<sub>2</sub>

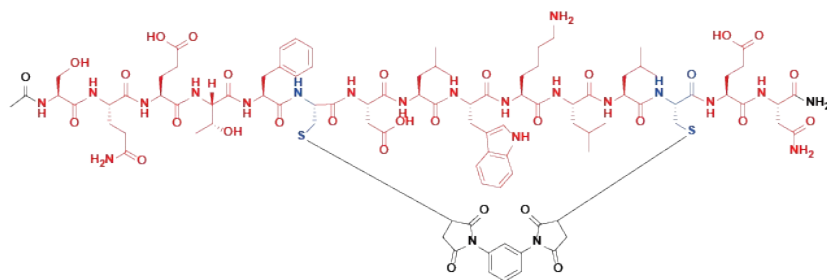

**Native unstapled p53a** Ac-SQETFSDLW-KLLPEN-NH<sub>2</sub>

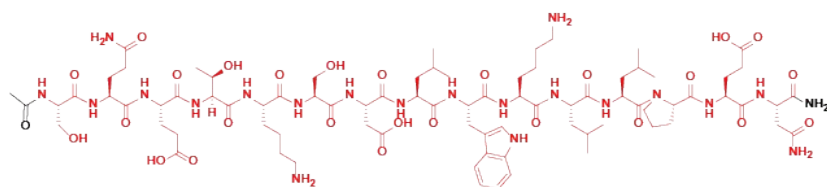

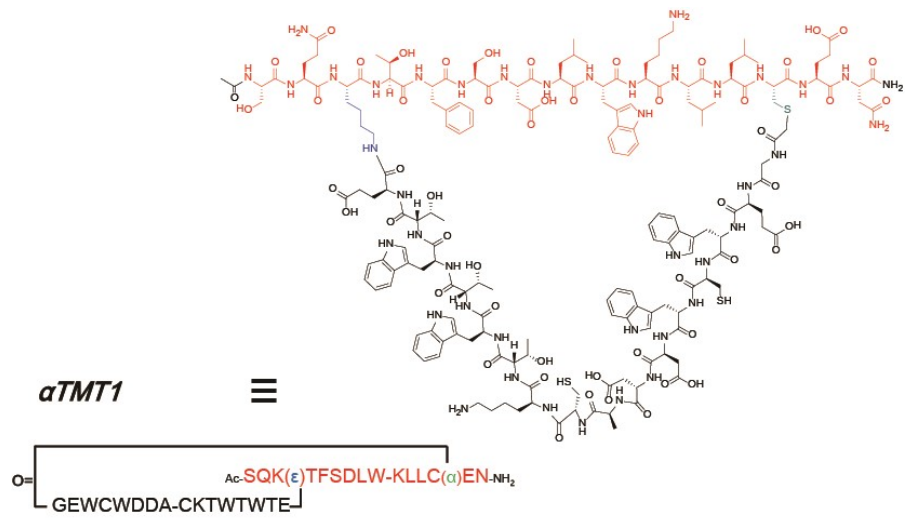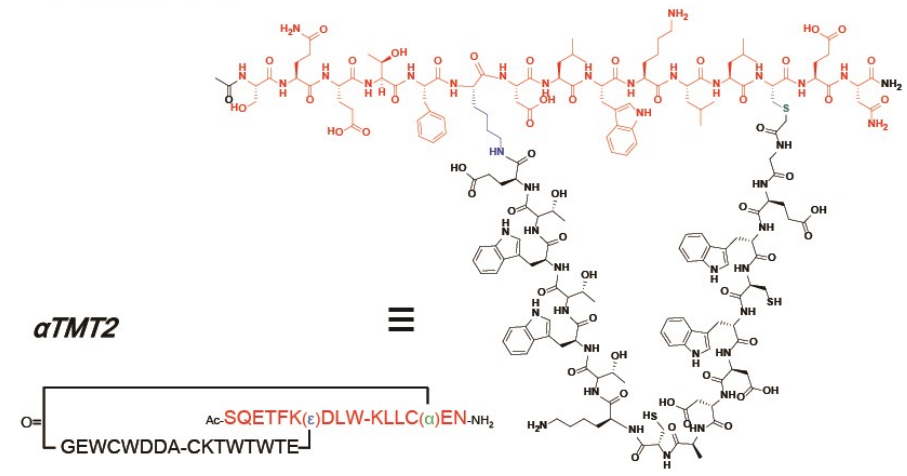

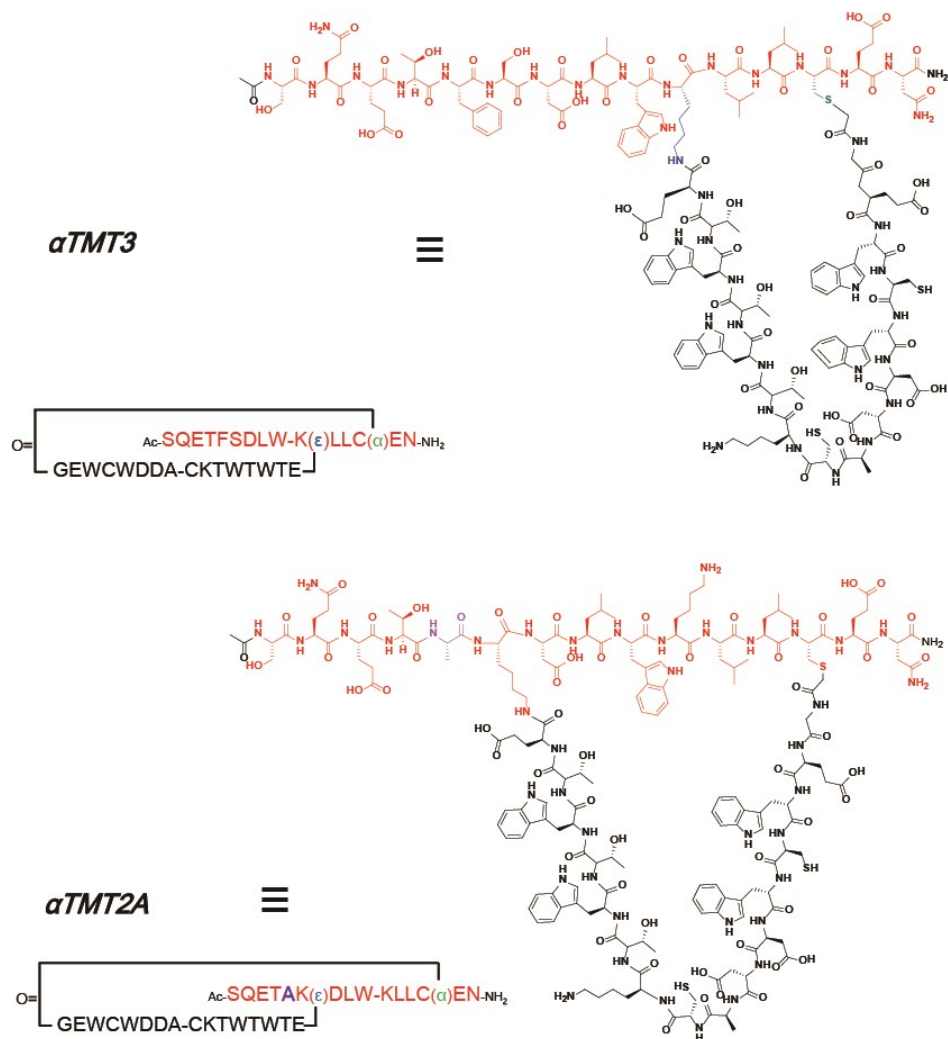

***hDM2***

histag TEV cleavage site  
 HHHHHHSSGENLYFQSQIPASEQETLVRPKPLLLKLLKSVGAK  
 DTYTMKEVLFYLGQYIMTKRLYDEKQQHIVYCSNDLLGLDFGVPS  
 FSVKEHRKIYTMIRNLVVVNQQESSDSGTSVSEN

**Fig. S1** Chemical structures of peptides and sequence of the expressed hDM2 proteins.

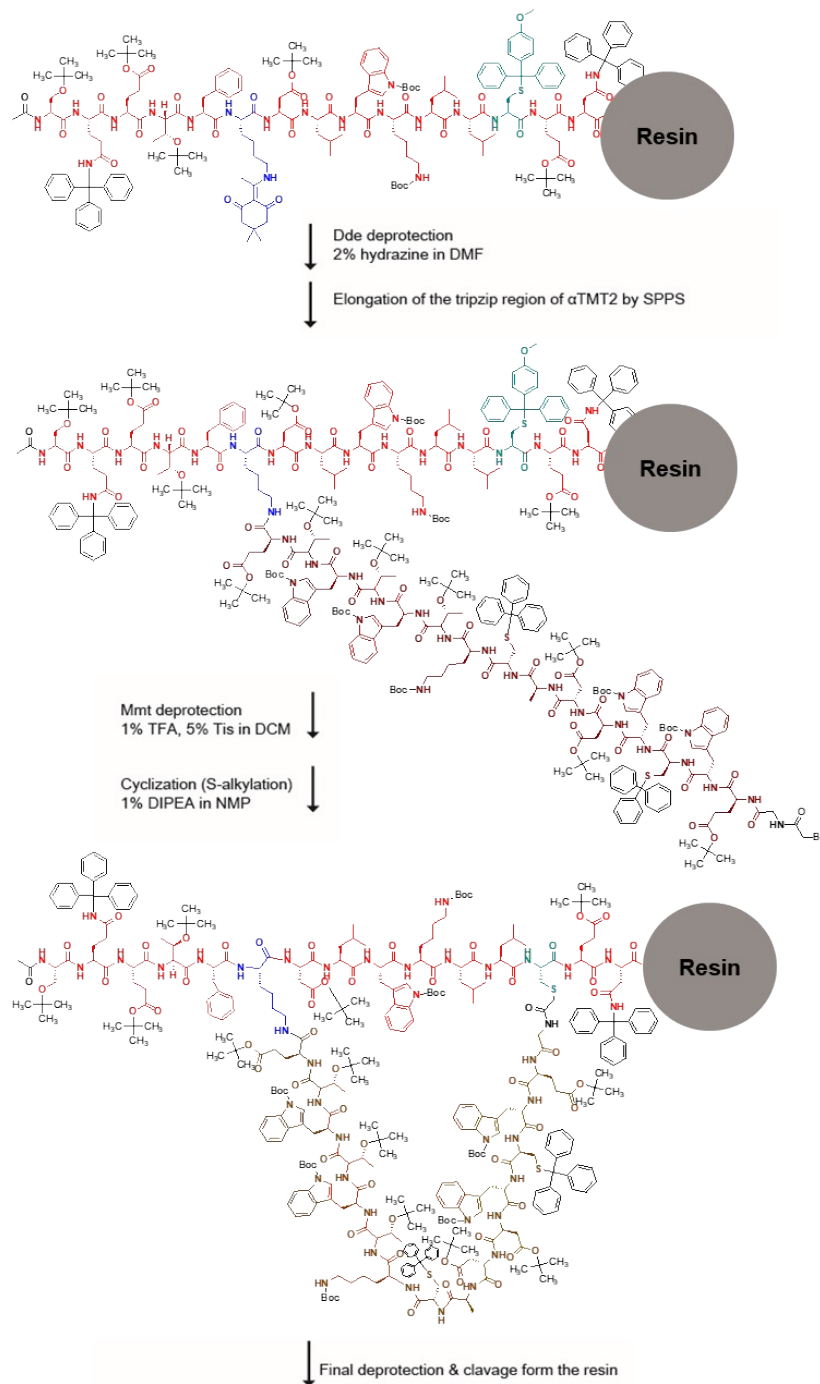

**Fig. S2** Reaction scheme of the  $\alpha$ TMT2 synthesis.

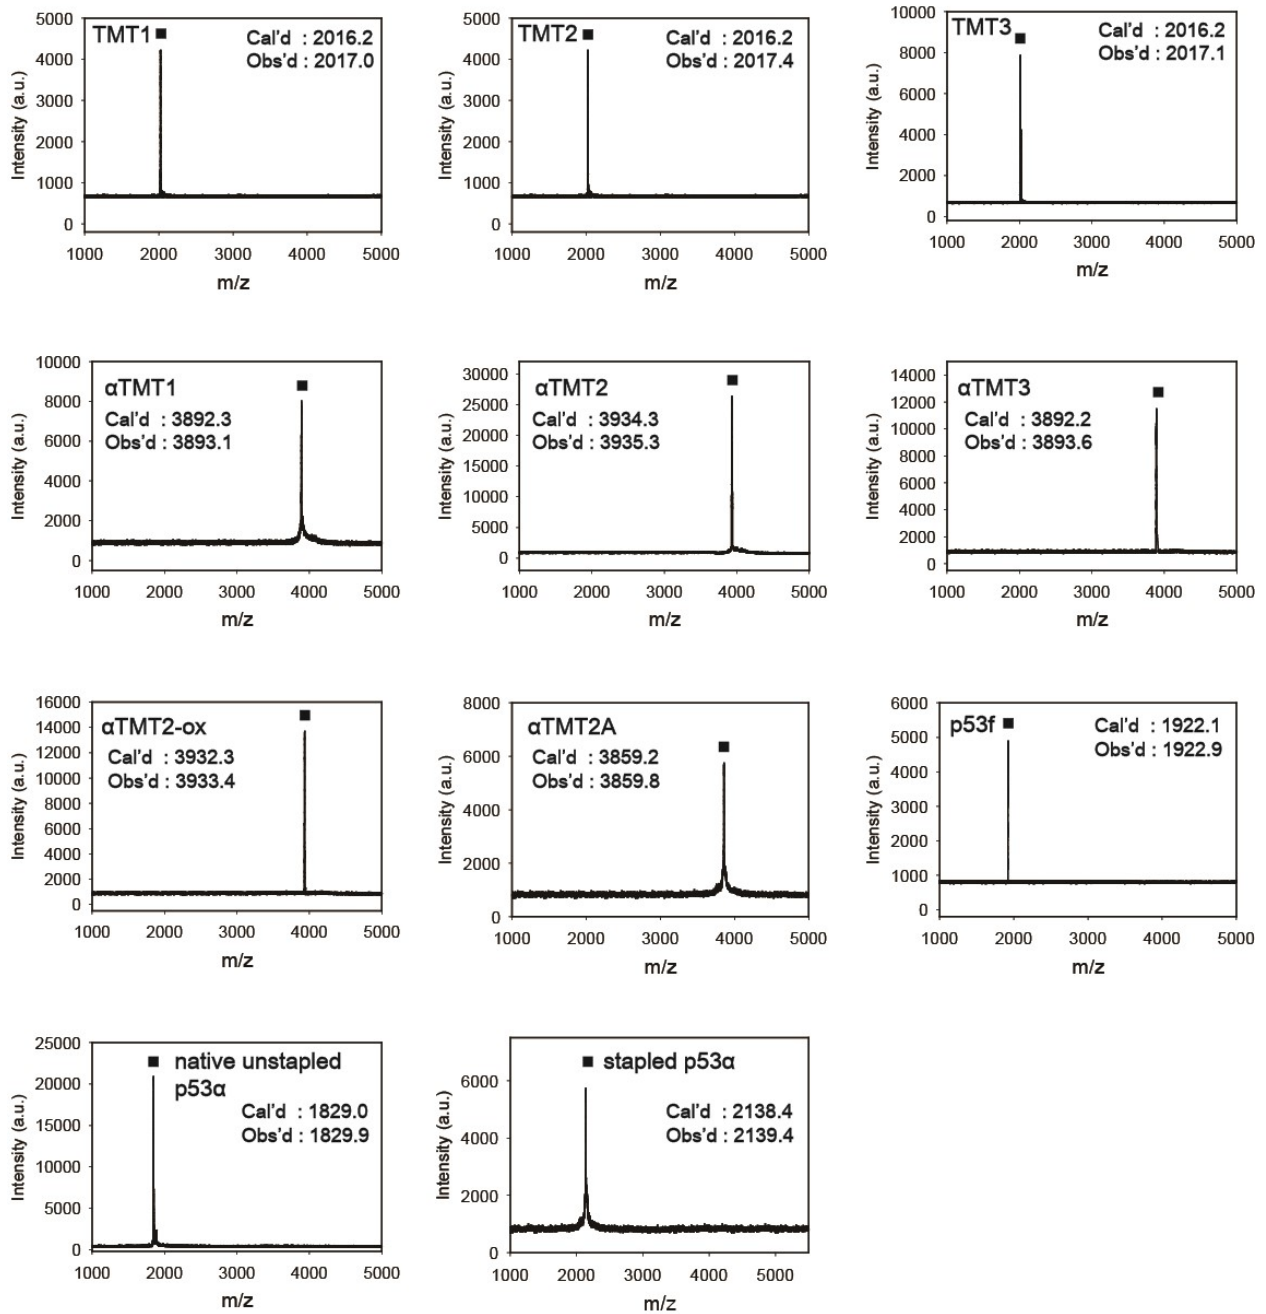

Fig. S3 MALDI-TOF MS spectra of peptides.

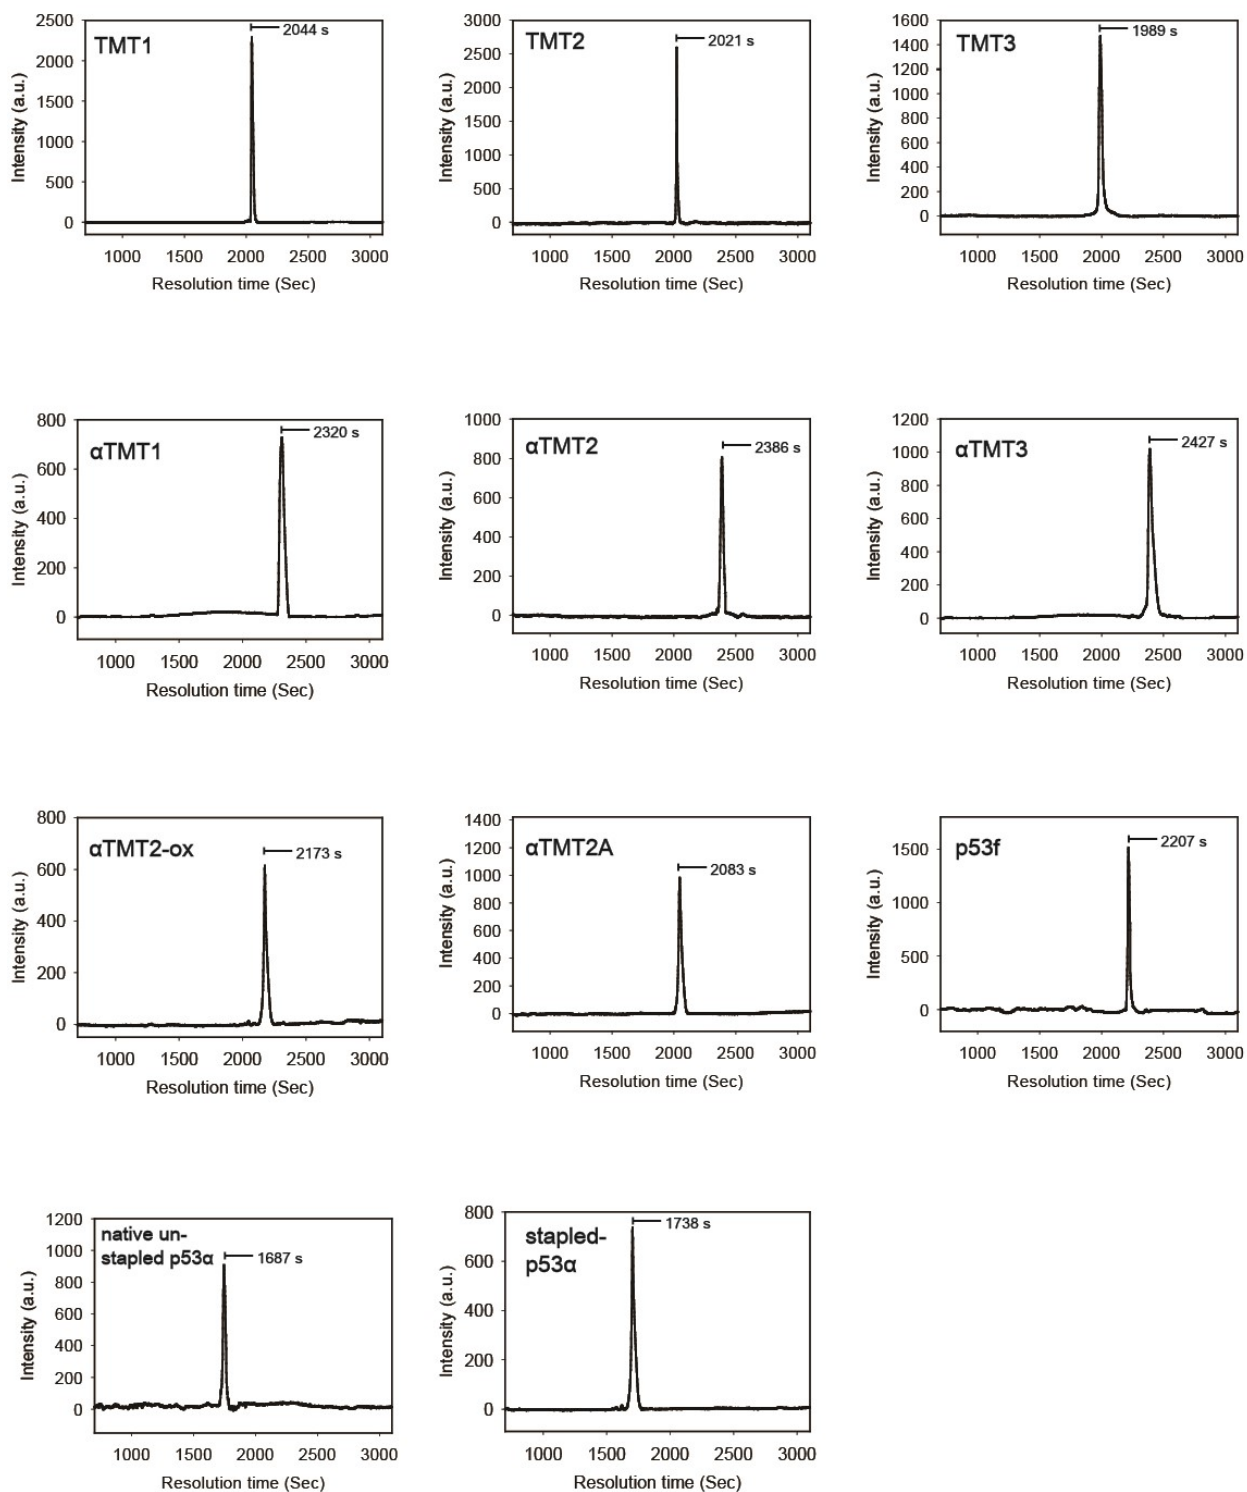

**Fig. S4** HPLC chromatograms of peptides. Reverse-phase (RP) HPLC was performed using a Vydac C18 column (10 × 250 mm, 300 Å) with a gradient of 30% to 50% MeCN with 0.1% TFA.



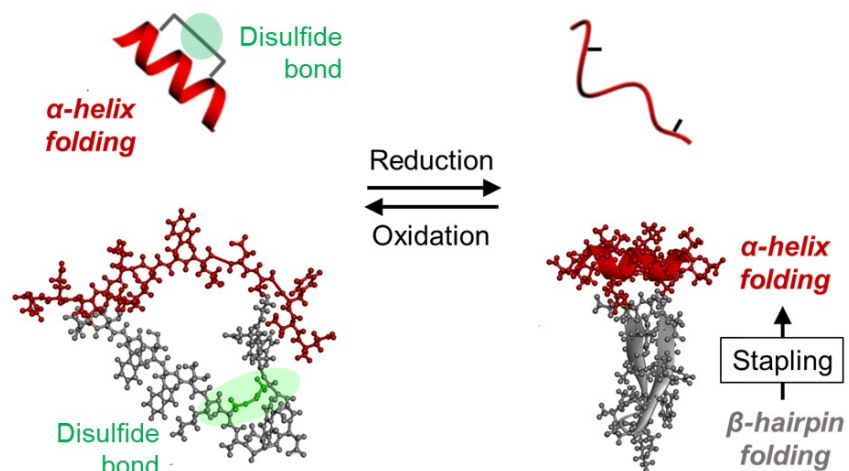

**Fig. S5** Schematic illustration of redox-responsive  $\alpha$ -helix stabilization behaviors of the typical disulfide stapling (top) and  $\alpha$ TMT (bottom) strategies.

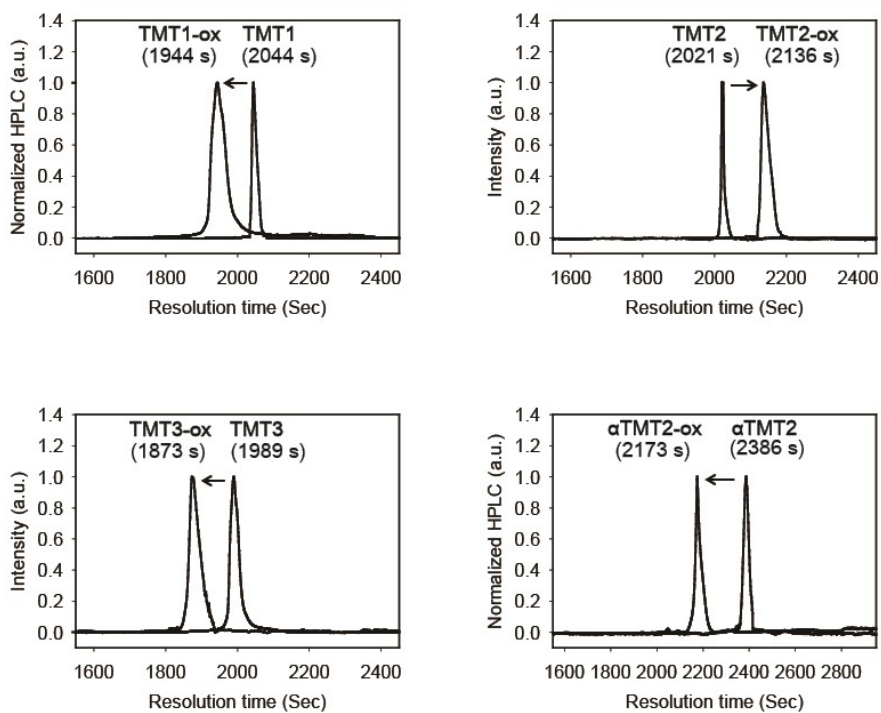

**Fig. S6** HPLC peak shift after oxidation (disulfide bond formation) of peptides.

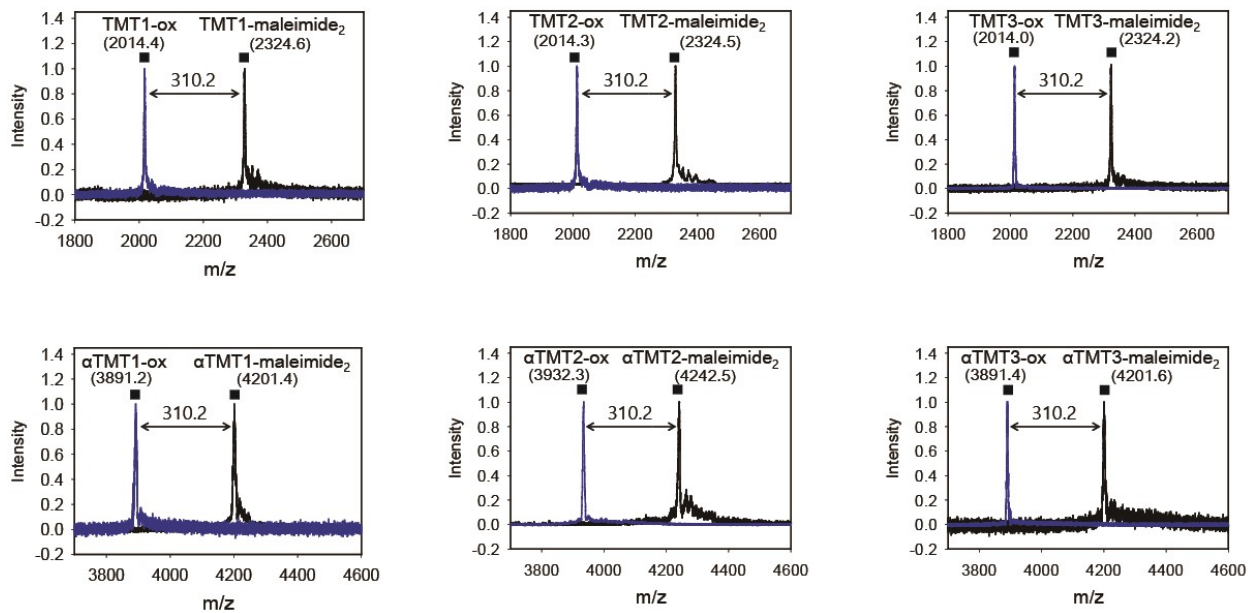

**Fig. S7** MALDI-TOF MS spectra of peptides and their conjugates with n-methoxycarbonyl maleimide (MW: 155.11 Da).

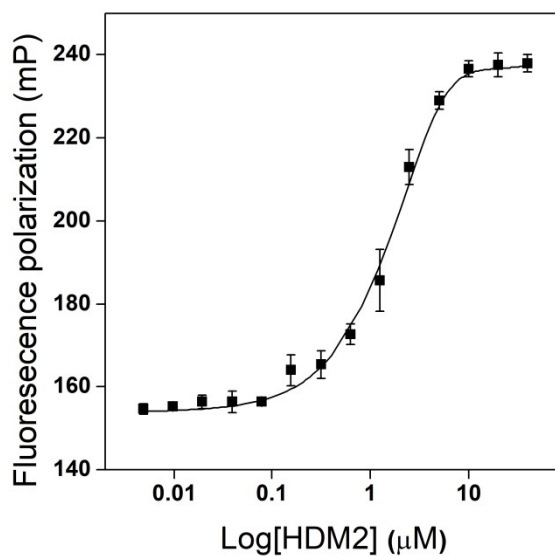

**Fig. S8** Changes in the FP intensity of p53f (100 nM) upon titration with hDM2 in Tris-Cl buffer solution (pH 8.0, 20 mM, 10 mM imidazole, 150 mM NaCl, 10% glycerol) at room temperature. The filter sets were 485/15 excitation and 535/25 emission.

| Peptides              | $\alpha$ -Helix Sequence                                     | EC50 ( $\mu$ M) | K <sub>d</sub> ( $\mu$ M) |
|-----------------------|--------------------------------------------------------------|-----------------|---------------------------|
| Nutlin-3a             | -                                                            | 0.154           | 0.145                     |
| $\alpha$ TMT1         | Ac-SQK( $\epsilon$ )TFSDLWKLLC( $\alpha$ )EN-NH <sub>2</sub> | 0.547           | 0.515                     |
| $\alpha$ TMT2         | Ac-SQETFK( $\epsilon$ )DLWKLLC( $\alpha$ )EN-NH <sub>2</sub> | 0.149           | 0.140                     |
| $\alpha$ TMT3         | Ac-SQETFSDLWK( $\epsilon$ )LLC( $\alpha$ )EN-NH <sub>2</sub> | 0.655           | 0.616                     |
| $\alpha$ TMT2A        | Ac-SQETAK( $\epsilon$ )DLWKLLC( $\alpha$ )EN-NH <sub>2</sub> | 4.584           | 4.314                     |
| $\alpha$ TMT2-ox      | Ac-SQETFK( $\epsilon$ )DLWKLLC( $\alpha$ )EN-NH <sub>2</sub> | 0.569           | 0.536                     |
| p53 $\alpha$ -stapled | Ac-SQETFCDLWKLLCEN-NH <sub>2</sub>                           | 0.343           | 0.323                     |

**Fig. S9** Calculated EC50 and dissociation constant (K<sub>d</sub>) values for the p53f/hDM2 complexes with the investigated peptides.

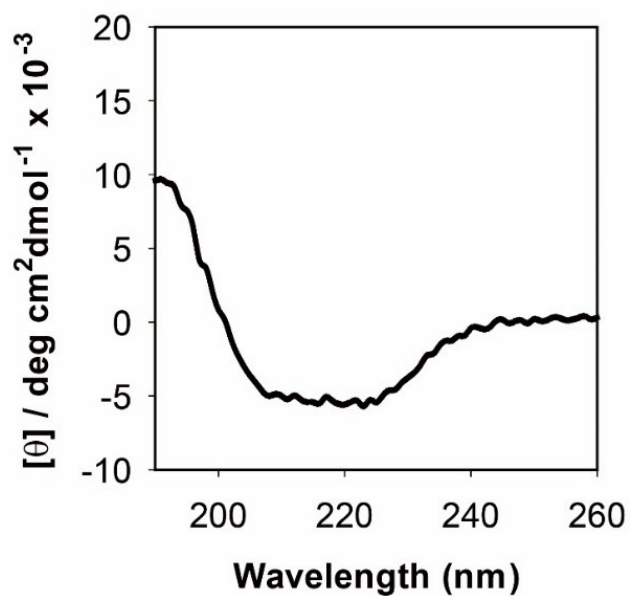

**Fig. S10** CD spectrum of the stapled p53 $\alpha$  peptides (20  $\mu$ M) in PBS (pH 7.0, 20 mM, 150 mM NaCl).

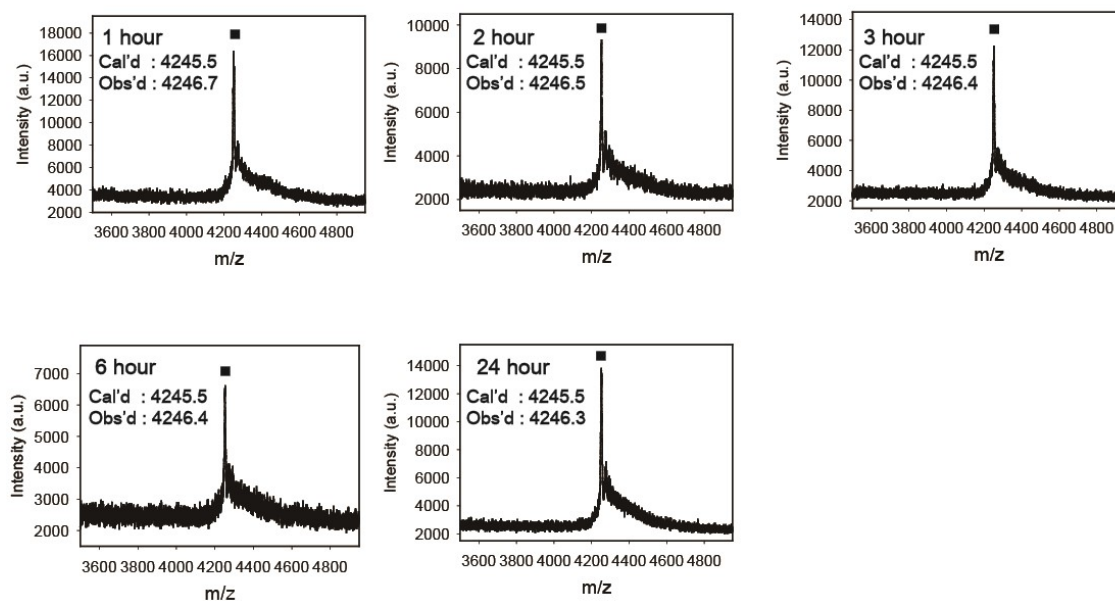

**Fig. S11** MALDI-TOF analysis of the  $\alpha$ TMT2 peptides after incubation in PBS (pH 7.0, 20 mM, 150 mM NaCl) for different times at room temperature and n-methoxycarbonyl maleimide (2 mM) coupling.

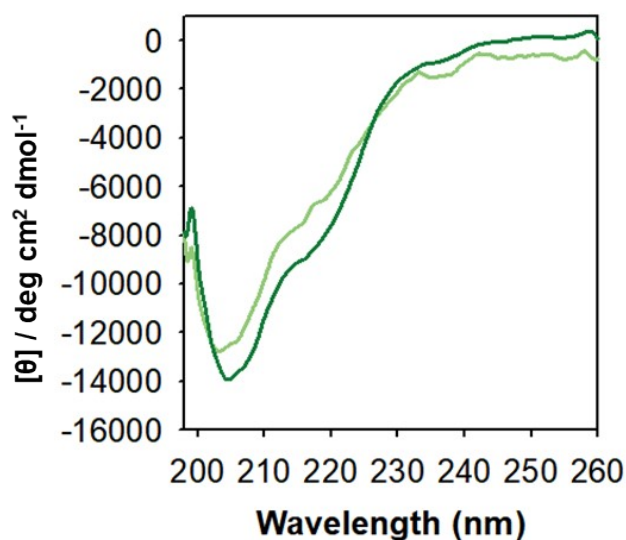

**Fig. S12** CD spectra of  $\alpha$ TMT2 (green) and  $\alpha$ TMT2-ox (light green) in PBS (pH 7.0, 20 mM, 150 mM NaCl) at room temperature.  $[\text{peptide}] = 20 \mu\text{M}$ .

## $\alpha$ TMT2

10 ns

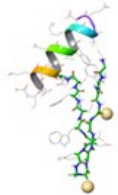

20 ns

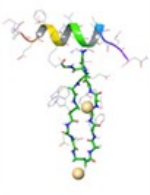

30 ns

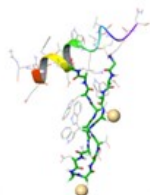

40 ns

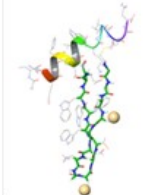

50 ns

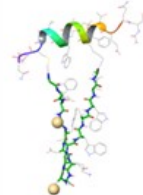

0 ns

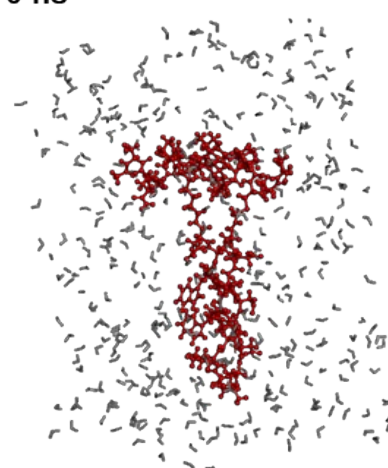

60 ns

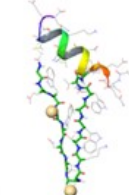

70 ns

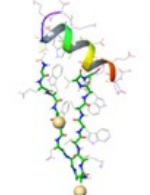

80 ns

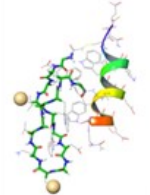

90 ns

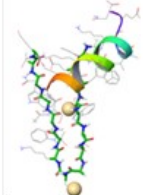

100 ns

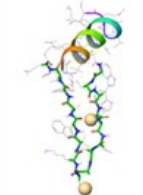

## $\alpha$ TMT2-ox

10 ns

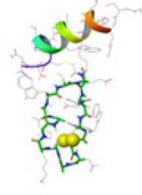

20 ns

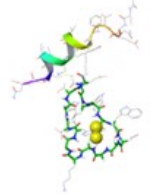

30 ns

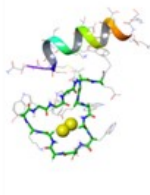

40 ns

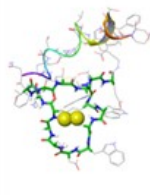

50 ns

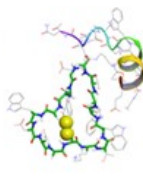

0 ns

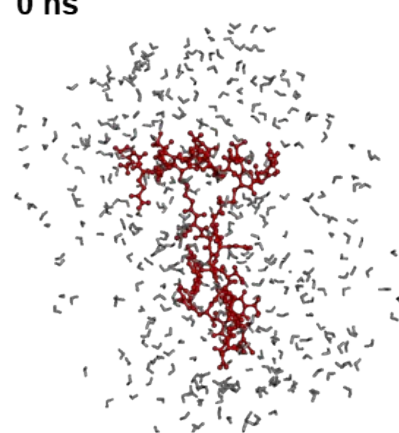

60 ns

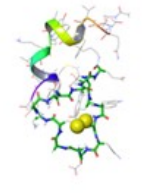

70 ns

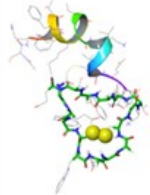

80 ns

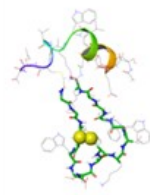

90 ns

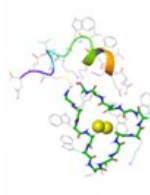

100 ns

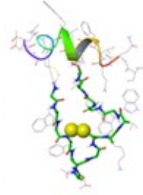

**Fig. S13** MD simulation results of folding behaviors of  $\alpha$ TMT2 and  $\alpha$ TMT2-ox and snapshots of the input models with their geometry.

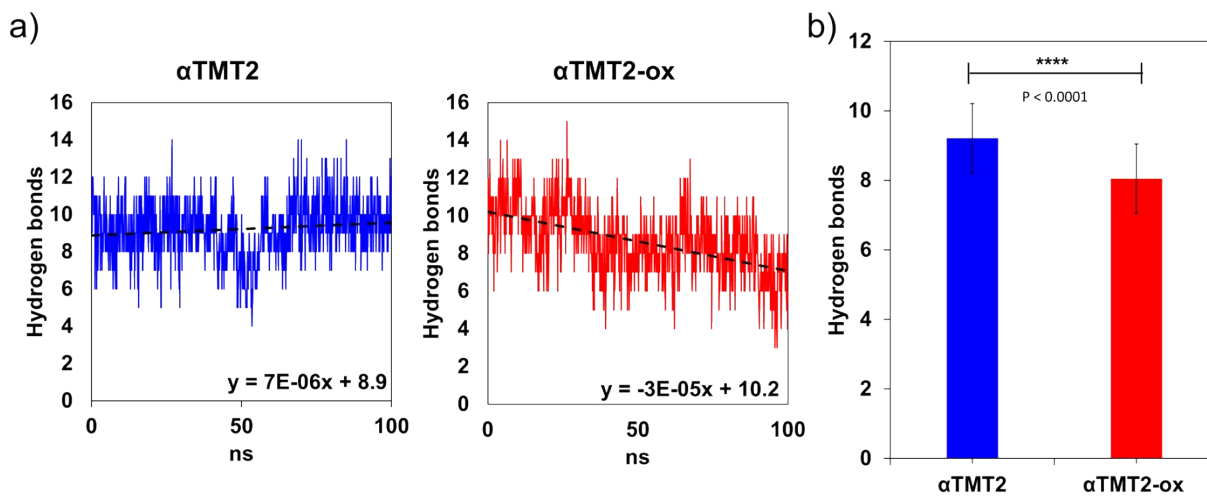

**Fig. S14** (a) The numbers of hydrogen bonds in the helical backbone of  $\alpha$ TMT2 and  $\alpha$ TMT2-ox and (b) the average numbers of these hydrogen bonds over the simulation time (100 ns).

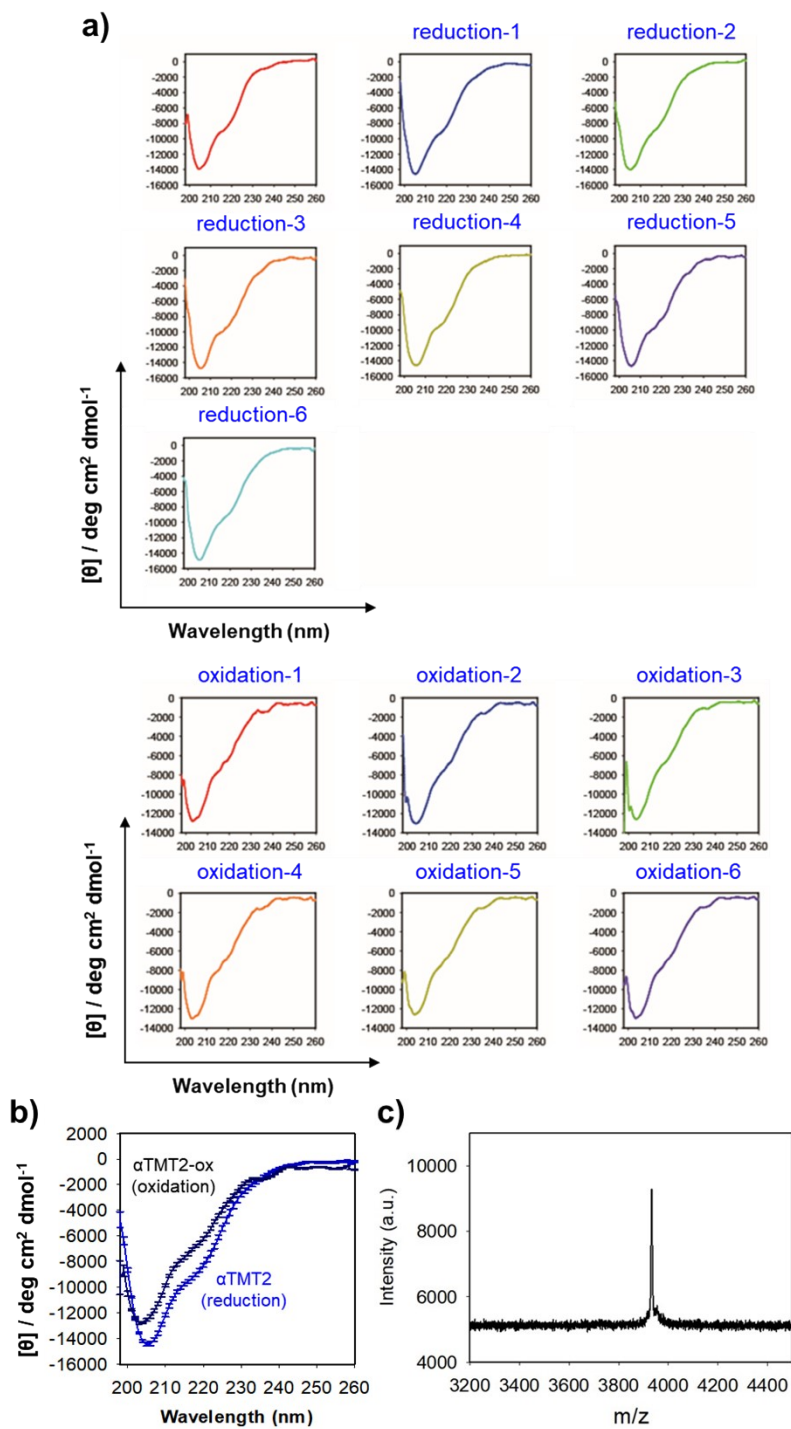

**Fig. S15** (a) CD spectra of  $\alpha\text{TMT2}$  and  $\alpha\text{TMT2-ox}$  during the six cycles of oxidation-reduction processes. (b) Averaged CD spectra of the oxidized and reduced  $\alpha\text{TMT2}$  peptides from the repeated oxidation-reduction experiment. (c) MALDI-TOF spectrum of  $\alpha\text{TMT2}$  after the repeated oxidation-reduction experiment (calculated MW: 3934.3, observed MW: 3935.6).

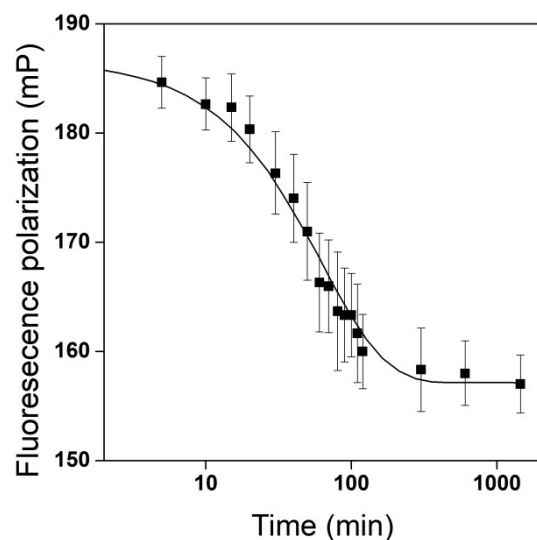

**Fig. S16** Time-dependent FP competition assay on the  $\alpha$ TMT2-ox peptides against p53f/hDM2 (100 nM/4  $\mu$ M) complexes in Tris-Cl buffer solution (pH 8.0, 20 mM, 10 mM imidazole, 150 mM NaCl, 10% glycerol) at room temperature, with the reducing agents (1 mM TCEP). The filter sets were 485/15 excitation and 535/25 emission. The experiment was performed in triplicate.

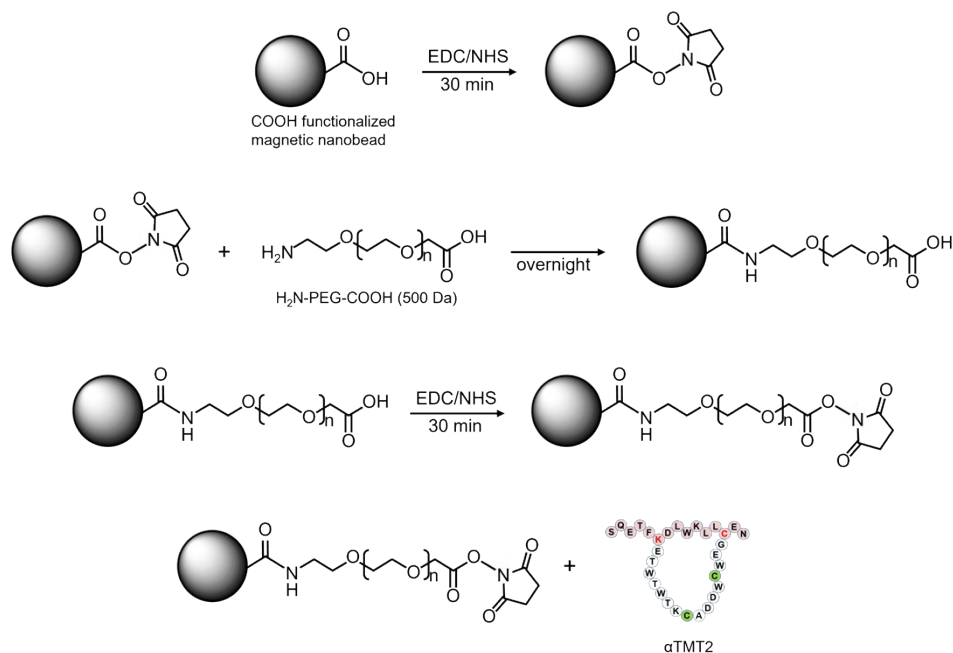

**Fig. S17** Synthetic scheme of  $\alpha$ TMT2-bead.



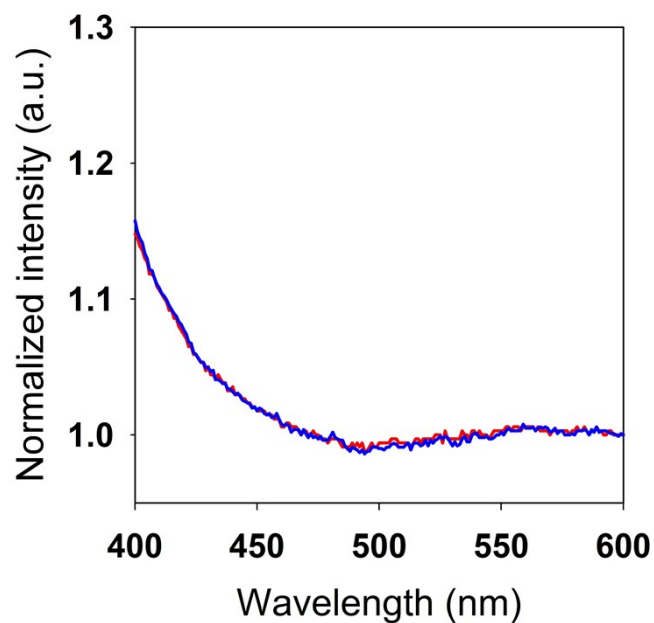

**Fig. S18** The capture-and-release (CAR) experiment using PEG-magnetic bead conjugates without peptides. UV-Vis absorption spectra of released hGCs before (red) and after (blue) 5 h incubation in PBS (pH 7.0, 20 mM, 150 mM NaCl) containing the oxidizing agents (35  $\mu$ M) at room temperature.
